# Supplementary figures and images for: Temperature increase and frost decrease driving upslope elevational range shifts in Alpine grouse and hares
Source: PubMed Central journal article supplement — Glob Chang Biol. 2021 Oct 10;27(24):6602–14. doi: 10.1111/gcb.15909 (PMC9292969; doi:10.1111/gcb.15909), 2021-10-10

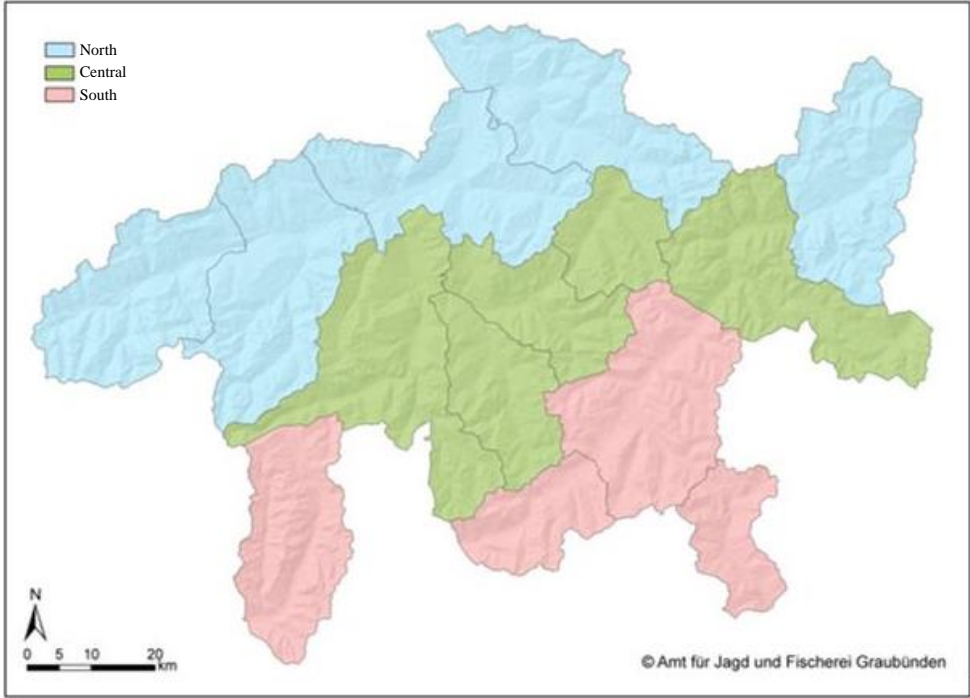

Supplement: GCB-27-6602-s002.pdf [file GCB-27-6602-s002.pdf]
